# Supplementary material for: Effects of a Nanonetwork-Structured Soil Conditioner on Microbial Community Structure
Source: MDPI journal article supplement (doi:10.3390/biology12050668), 2023-04-28
Supplement: s1 [file s1]

# Supplementary Materials for

## Effects of a Nanonetwork-Structured Soil Conditioner on Microbial Community Structure

Jingjing Cao <sup>1,2,†,\*</sup>, Pan Zhao <sup>1,2,3,†,\*</sup>, Dongfang Wang <sup>4</sup>, Yonglong Zhao <sup>1,2</sup>, Zhiqin Wang <sup>1,2</sup>, Naiqin Zhong <sup>1,2,3,\*</sup>

<sup>1</sup> State Key Laboratory of Plant Genomics, Institute of Microbiology, Chinese Academy of Sciences, Beijing 100101, China; caojingjing@im.ac.cn (J.C.); ylzhaoy97101@163.com (Y.Z.); wangzq1210@163.com (Z.W.);

<sup>2</sup> Engineering Laboratory for Advanced Microbial Technology of Agriculture, Chinese Academy of Sciences, Beijing 100101, China

<sup>3</sup> The Enterprise Key Laboratory of Advanced Technology for Potato Fertilizer and Pesticide, Hulunbuir 021000, China

<sup>4</sup> College of Environmental Science and Engineering, Donghua University, Shanghai 201620, China; [dfwang@dhu.edu.cn](mailto:dfwang@dhu.edu.cn) (D. W.)

\* Correspondence: zhaop@im.ac.cn (P.Z.); nqzhong@im.ac.cn (N.Z.)

† These authors contributed equally to this work.

### This file includes:

Figure S1 to S6

Tables S1

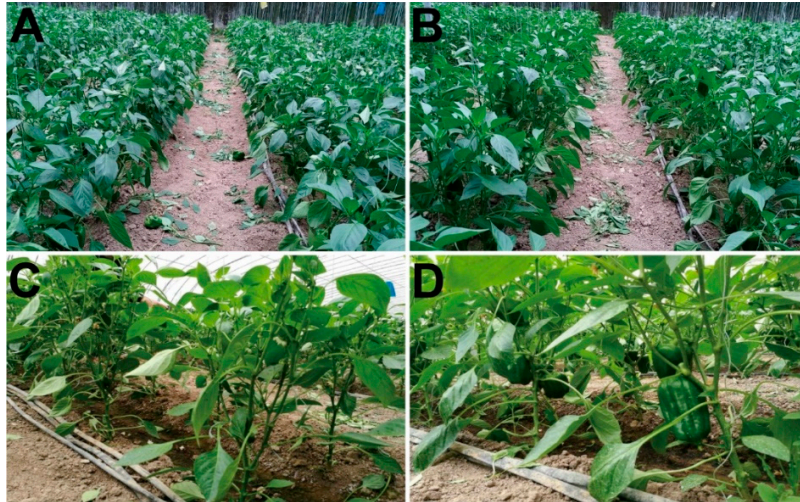

**Figure S1.** Photographs of soil conditioner on pepper. (A and C) Plants growing in CK; (B and D) plants growing in SC3.

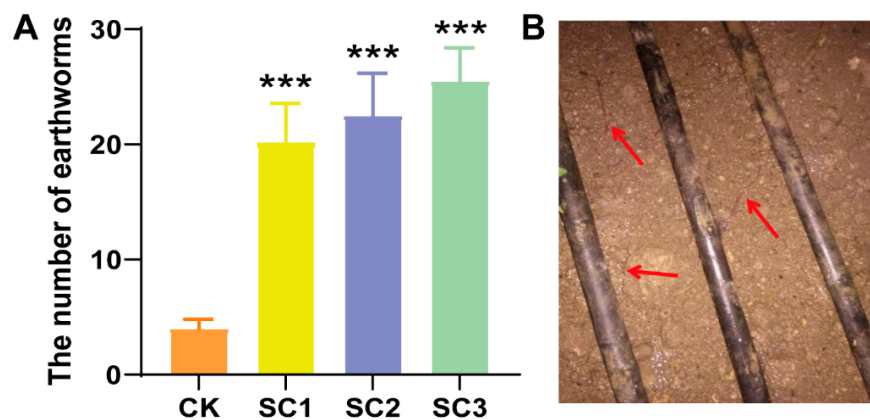

**Figure S2.** The number of earthworms. (A) The number of earthworms in soil treated with different amounts of SC. (B) Digital photograph of earthworms in soil with SC3 (400 kg/acre) treatment (\*\* $p < 0.001$ ).

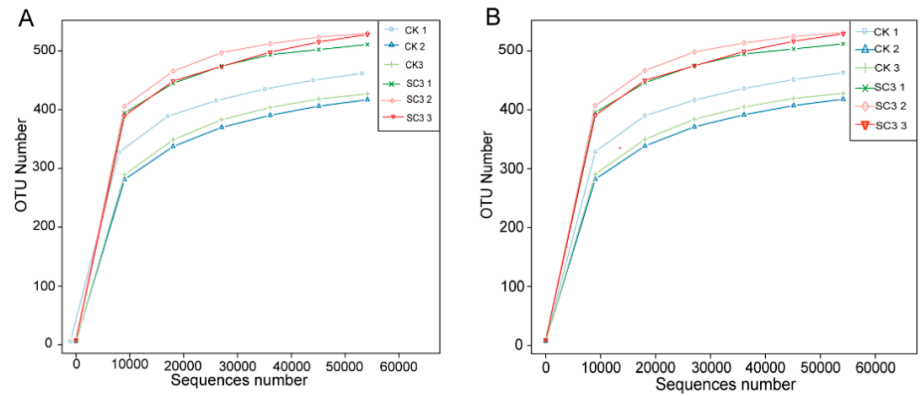

**Figure S3.** The rarefaction curve of samples. (A) 16S rRNA; (B) ITS. Rarefaction curves of OTUs clustered for a dissimilarity of 3%.

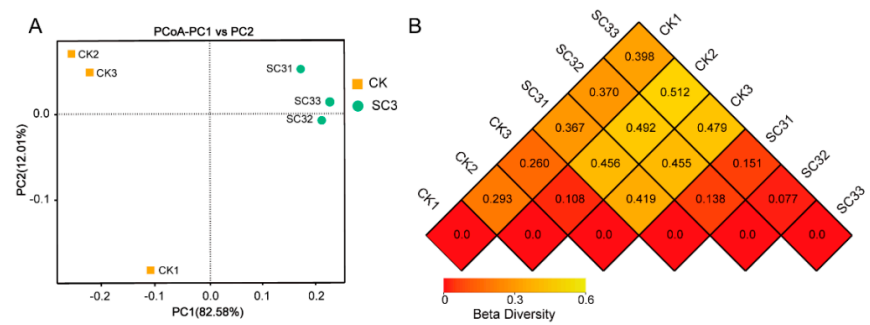

**Figure S4.** Beta-diversity analysis showing the relatedness of bacterial communities in different samples. (A) The principle co-ordinate analysis (PCoA). (B) The heatmap of beta-diversity index. The number in the square represents the diversity between the two samples. The bigger the number, the more difference in beta-diversity.

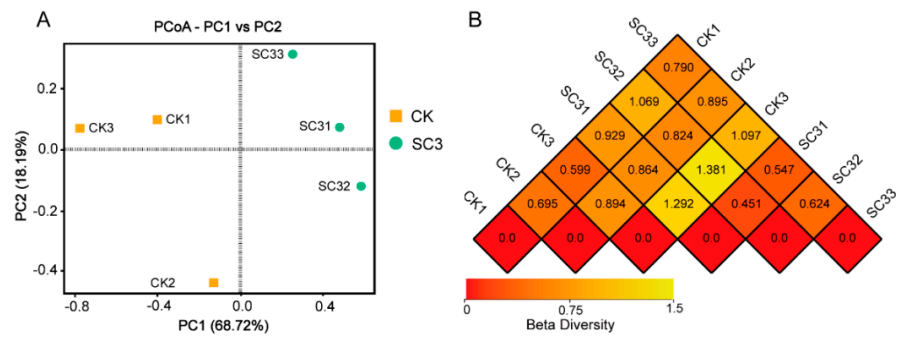

**Figure S5.** Beta-diversity analysis showing the relatedness of fungal communities in different samples. (A)The principle co-ordinate analysis (PCoA). (B) The heatmap of beta-diversity index. The number in the square represents the diversity between the two samples. The bigger the number, the more difference in beta-diversity.

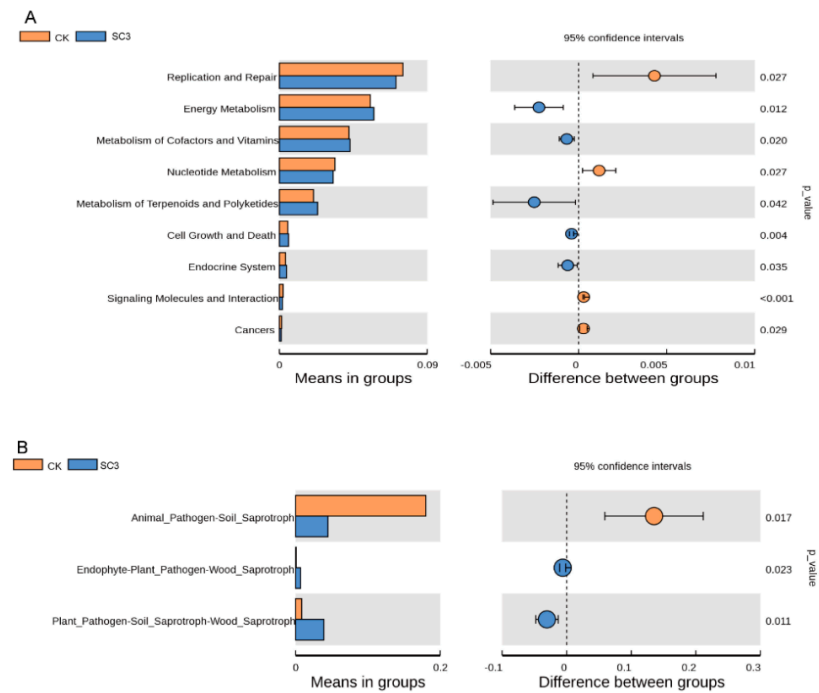

**Figure S6.** Difference analysis via *t*-test based on the results of functional annotation. (A) Functional analyses for bacterial communities via PICRUSt; (B) Functional analyses for fungal communities via FUNGuild.

**Table S1.** Sequencing statistic

|             | Sample_name | Clean_Reads | Base (nt) | AvgLen (nt) | Q20   | GC%   | Effective% |
|-------------|-------------|-------------|-----------|-------------|-------|-------|------------|
| 16S<br>rRNA | CK1         | 80123       | 33149469  | 413         | 81.59 | 55.6  | 94.12      |
|             | CK2         | 80346       | 33453661  | 416         | 82.02 | 54.8  | 91.73      |
|             | CK3         | 92494       | 38467922  | 415         | 80.97 | 55.06 | 97.16      |
|             | SC31        | 86348       | 35728107  | 413         | 76.89 | 56.9  | 96.71      |
|             | SC32        | 90690       | 37493233  | 413         | 79.11 | 57.32 | 91.08      |
|             | SC33        | 80149       | 33127959  | 413         | 78.8  | 57.22 | 94.06      |
| ITS1-5F     | CK1         | 80130       | 18795920  | 234         | 67.91 | 44.45 | 96.84      |
|             | CK2         | 80193       | 18332893  | 228         | 78.76 | 46.2  | 96.07      |
|             | CK3         | 80215       | 19170951  | 238         | 67.63 | 47.15 | 97.27      |
|             | SC31        | 80161       | 17689391  | 220         | 72.49 | 45.95 | 98         |
|             | SC32        | 80138       | 18029856  | 224         | 81.57 | 46.62 | 98.13      |
|             | SC33        | 80081       | 18838169  | 235         | 85.11 | 45.99 | 96.25      |
