# Supplementary material for: Effects of a Nanonetwork-Structured Soil Conditioner on Microbial Community Structure
Source: Biology (Basel). 2023 Apr 28;12(5):668. doi: 10.3390/biology12050668 (PMC10215273; doi:10.3390/biology12050668)
Supplement: Supplementary file 1 [file biology-12-00668-s001.zip]

Archive with 7 entries (7 files):
- biology-2315233-supplementary.pdf
- Figure S1.tif
- figure S2.tif
- figure S3 .tif
- figure S4.tif
- figure S5.tif
- figure S6.tif
